# Supplementary material for: Validation Study of a Predictive Algorithm to Evaluate Opioid Use Disorder in a Primary Care Setting
Source: PubMed Central journal article supplement — Health Serv Res Manag Epidemiol. 2017 Aug 24;4:2333392817717411. doi: 10.1177/2333392817717411 (PMC5574481; doi:10.1177/2333392817717411), 2017-08-24
Supplement: Supplementary_Table_1.pdf [file Supplementary_Table_1.pdf]

**Supplementary Table 1.** Sensitivities and specificities of the profile using different cut-offs of profile scores to predict OUD.

| profile score $\geq$ | Sensitivity | Specificity | profile score $\geq$ | Sensitivity | Specificity |
|----------------------|-------------|-------------|----------------------|-------------|-------------|
| 4                    | 100.00%     | 0.08%       | 24                   | 65.49%      | 88.44%      |
| 5                    | 100.00%     | 0.40%       | 25                   | 63.72%      | 91.59%      |
| 6                    | 100.00%     | 0.49%       | 26                   | 56.42%      | 94.18%      |
| 7                    | 99.56%      | 0.89%       | 27                   | 48.89%      | 95.55%      |
| 8                    | 99.12%      | 2.75%       | 28                   | 44.47%      | 96.36%      |
| 9                    | 98.45%      | 6.87%       | 29                   | 40.04%      | 96.77%      |
| 10                   | 96.02%      | 12.29%      | 30                   | 35.18%      | 97.25%      |
| 11                   | 93.58%      | 20.13%      | 31                   | 29.65%      | 97.74%      |
| 12                   | 91.81%      | 26.68%      | 32                   | 25.22%      | 97.90%      |
| 13                   | 91.15%      | 35.49%      | 33                   | 22.12%      | 98.30%      |
| 14                   | 89.82%      | 42.93%      | 34                   | 19.47%      | 98.71%      |
| 15                   | 88.27%      | 51.17%      | 35                   | 15.27%      | 98.87%      |
| 16                   | 87.17%      | 57.80%      | 36                   | 11.50%      | 99.11%      |
| 17                   | 85.84%      | 63.95%      | 37                   | 8.85%       | 99.35%      |
| 18                   | 83.19%      | 68.63%      | 38                   | 6.64%       | 99.68%      |
| 19                   | 80.31%      | 73.40%      | 39                   | 5.09%       | 99.68%      |
| 20                   | 77.21%      | 77.77%      | 40                   | 3.10%       | 99.84%      |
| 21                   | 73.67%      | 80.36%      | 41                   | 1.55%       | 99.92%      |
| 22                   | 71.46%      | 82.30%      | 42                   | 0.88%       | 99.92%      |
| 23                   | 67.92%      | 85.37%      |                      |             |             |
